# Supplementary material for: Distance from home to motor vehicle crash location: Implications for license restrictions among medically-at-risk older drivers
Source: bioRxiv or medRxiv preprint supplement (doi:10.1101/2021.08.20.21262345), 2021-08-25
Supplement: Supplementary file [file media-1.pdf]

## Supplementary Tables and Figures

**Supplementary Table S1:** Frequency and proportion of clinical conditions among crash-involved drivers in New Jersey, ages 68 years and older, 2007-2017 (n=197,122).

| Clinical conditions <sup>a</sup>                                                         | N (%)          |
|------------------------------------------------------------------------------------------|----------------|
| Cataracts                                                                                | 125,865 (63.9) |
| Ischemic heart disease                                                                   | 108,452 (55.0) |
| Rheumatoid/Osteoarthritis                                                                | 101,622 (51.6) |
| Diabetes                                                                                 | 80,284 (40.7)  |
| Glaucoma                                                                                 | 53,272 (27.0)  |
| Heart failure                                                                            | 51,814 (26.3)  |
| Acquired hypothyroidism                                                                  | 51,090 (25.9)  |
| Peripheral vascular disease                                                              | 49,592 (25.2)  |
| Chronic Obstructive Pulmonary Disease (COPD)                                             | 42,983 (21.8)  |
| Chronic kidney disease                                                                   | 39,549 (20.1)  |
| Chronic pain fatigue and fibromyalgia                                                    | 38,906 (19.7)  |
| Depression                                                                               | 37,135 (18.8)  |
| Sensory deafness and hearing impairment                                                  | 27,344 (13.9)  |
| Anxiety disorders                                                                        | 25,373 (12.9)  |
| Stroke or Transient Ischemic Attack (TIA)                                                | 24,287 (12.3)  |
| Alzheimer's disease and related or senile dementia                                       | 15,361 (7.8)   |
| Acute myocardial infarction                                                              | 8,117 (4.1)    |
| Migraine and other chronic headache                                                      | 5,444 (2.8)    |
| Mobility impairments                                                                     | 3,698 (1.9)    |
| Epilepsy                                                                                 | 2,914 (1.5)    |
| Bipolar disorder                                                                         | 2,637 (1.3)    |
| Schizophrenia and other psychotic disorders                                              | 2,043 (1.0)    |
| Traumatic Brain Injury (TBI) & nonpsychotic mental disorders due to brain damage         | 1,533 (0.8)    |
| Personality disorders                                                                    | 970 (0.5)      |
| Spinal cord injury                                                                       | 664 (0.3)      |
| Attention-Deficit/Hyperactivity Disorder and other conduct disorders (ADHD) <sup>b</sup> | 638 (0.3)      |
| Multiple sclerosis and transverse myelitis                                               | 543 (0.3)      |
| Sensory blindness and visual impairment                                                  | 306 (0.2)      |
| Muscular dystrophy                                                                       | 63 (0.0)       |

%=Percentage

<sup>a</sup> The frequencies and proportions for the presence of clinical conditions are displayed in the table, and those for the absence of conditions are omitted.

<sup>b</sup> We kept the label for ADHD as assigned by the CCW although ADHD may no longer be considered a conduct disorder by many professional societies.

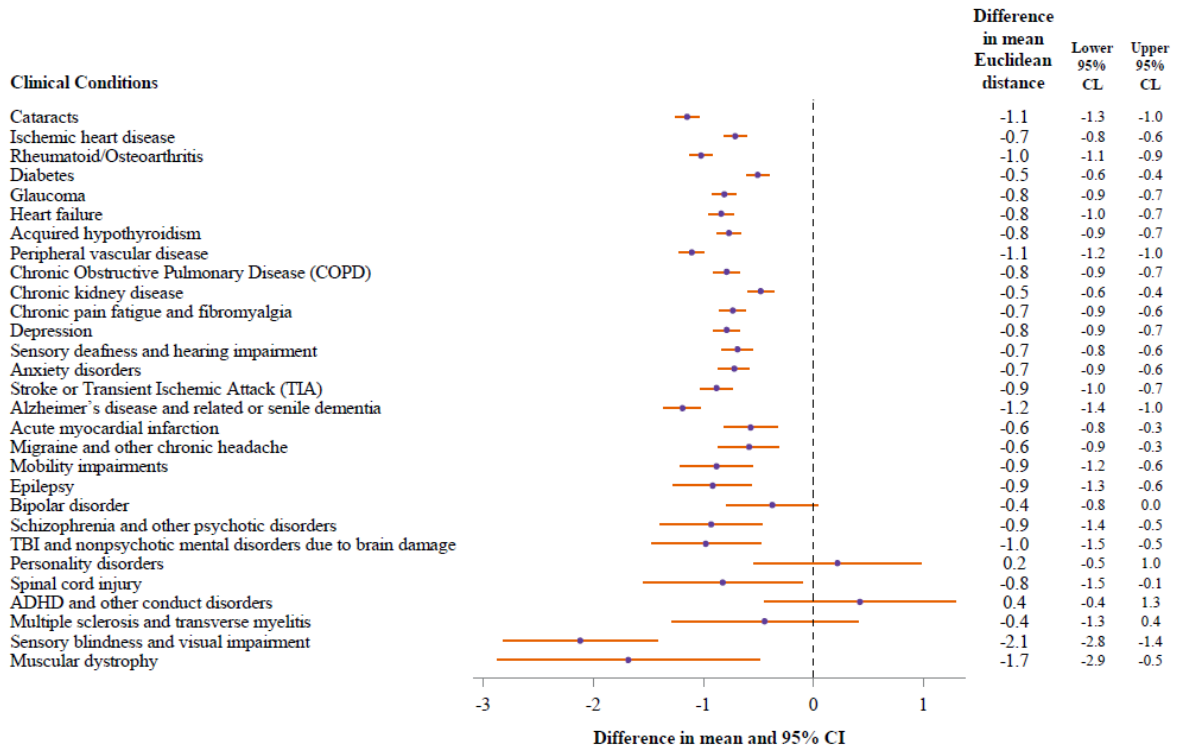

Supplementary Figure S1. Forest plot of differences in mean Euclidean distance from residential address to crash location and associated 95% confidence intervals (CI) among crash-involved drivers in New Jersey with and without the clinical conditions, ages 68 years and older, 2007-2017. Each difference in mean was found by subtracting the mean Euclidean distance of the group without the clinical condition from the group with it. CI=Confidence Interval, CL=Confidence Limit, TBI=Traumatic Brain Injury, ADHD=Attention-Deficit/Hyperactivity Disorder
